# Supplementary figures and images for: A microfluidic-chip-based system with loop-mediated isothermal amplification for rapid and parallel detection of Trichomonas vaginalis and human papillomavirus
Source: Royal Society of Chemistry journal article supplement (doi:10.1039/d3an01123b), 2023-01-01

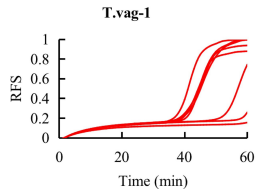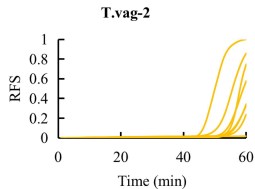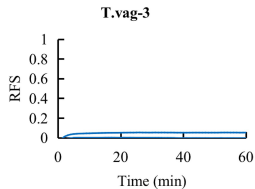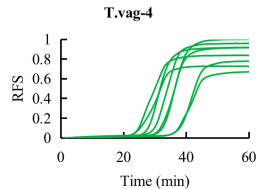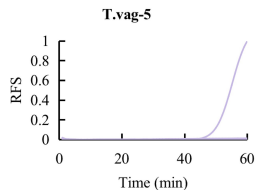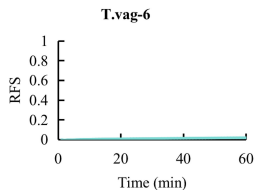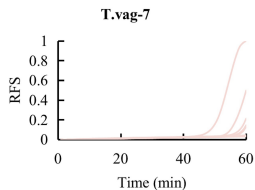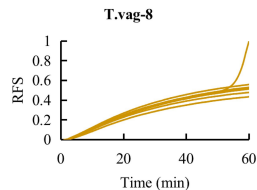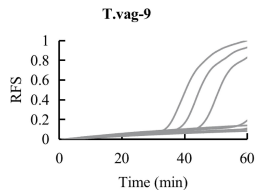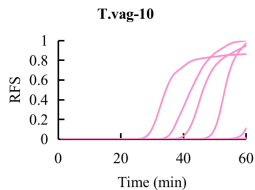

Supplement: d3an01123b2.pdf [file d3an01123b2.pdf]

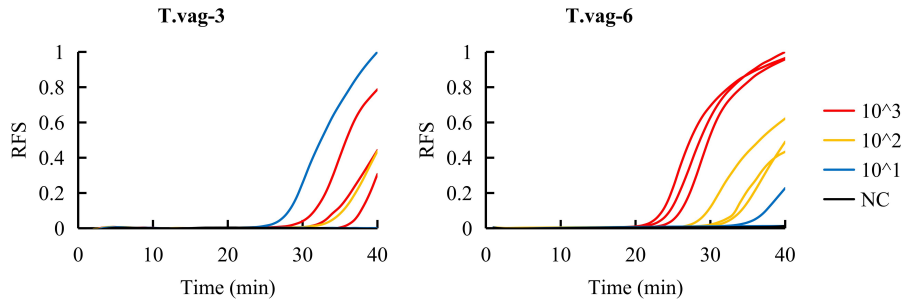

Supplement: d3an01123b3.pdf [file d3an01123b3.pdf]

**T.vag-6**

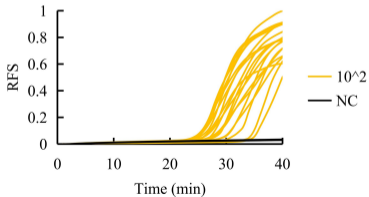

Supplement: d3an01123b4.pdf [file d3an01123b4.pdf]

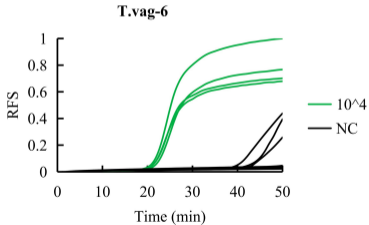

Supplement: d3an01123b5.pdf [file d3an01123b5.pdf]

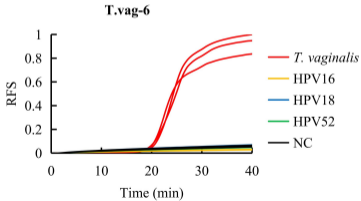

Supplement: d3an01123b6.pdf [file d3an01123b6.pdf]
